# Supplementary material for: Inhibition of Poly(A)-binding protein with a synthetic RNA mimic reduces pain sensitization in mice
Source: PubMed Central journal article supplement (PMC5750225; doi:10.1038/s41467-017-02449-5), 2018-01-02
Supplement: 41467_2017_2449_MOESM1_ESM.pdf [file 41467_2017_2449_MOESM1_ESM.pdf]

**a**

**PABP expression in the DRG**

| Species | Gene  | FPKM <sup>1</sup> |
|---------|-------|-------------------|
| Human   | PAPC1 | 124               |
| Human   | PAPC4 | 29                |
| Human   | PAPC3 | 0.03              |
| Mouse   | PAPC1 | 20                |
| Mouse   | PAPC4 | 3.5               |
| Mouse   | PAPC3 | 0.01              |

<sup>1</sup>Fragments per kilobase mapped (FPKM) normalized to the expression level of the upper quartile

**b**

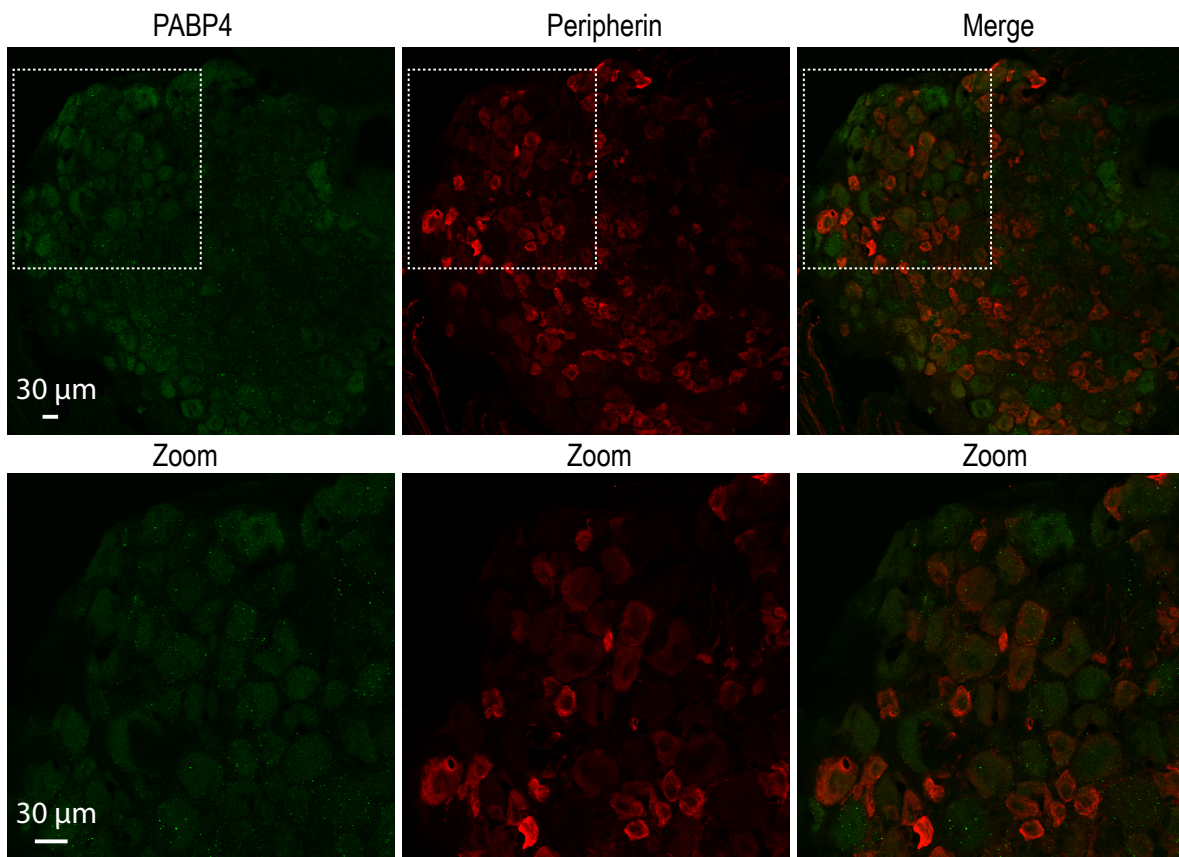

**Supplementary figure 1.** Expression and immunoreactivity of PABP4 in the DRG. (a) Expression of PABP isoforms in DRG of mouse and humans based on high-throughput sequencing. (b) PABP4, the second most abundant isoform in the DRG, fails to show a clear immunoreactivity in the DRG.

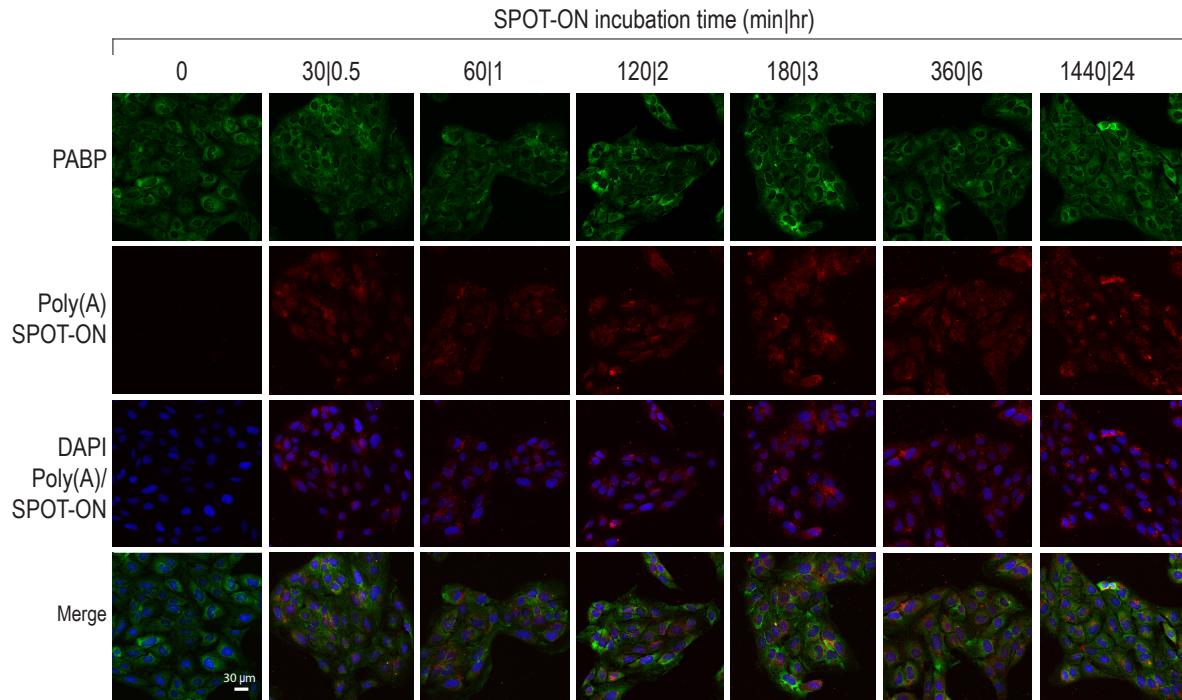

**Supplementary figure 2.** Time course showing the cellular uptake of SPOT-ONs. Cy-3 labeled Poly(A) SPOT-ONs are stable, efficiently taken up and distributed throughout the U2OS cells. Time course of quantification is shown in figure 2g.

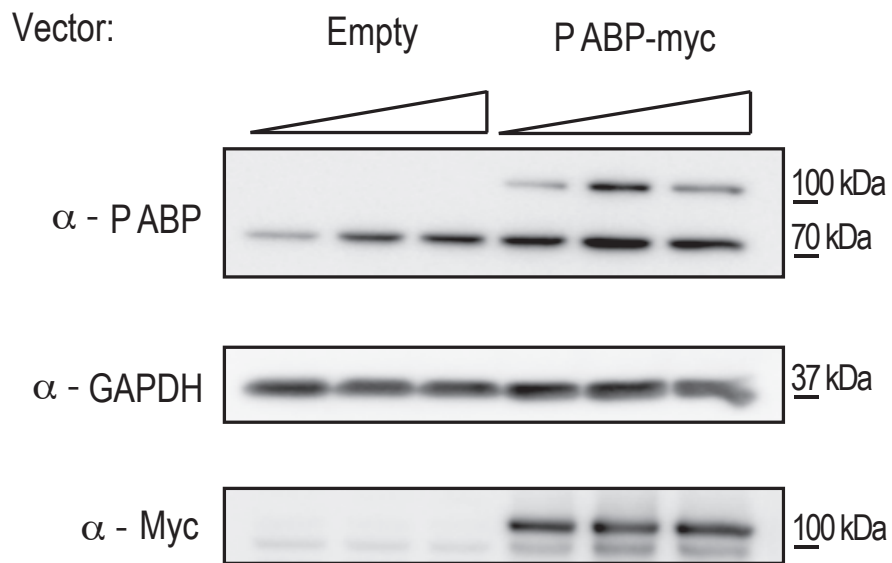

**Supplementary figure 3.** Overexpression of PABP confirmed by immunoblot. Antibodies to PABP, GAPDH, and Myc are arranged from Top to bottom. Three concentrations of vector (0.5, 1, and 2  $\mu$ g) were transfected as before and expressed for 48 hours. Recombinant PABP was detected with a myc epitope tag.

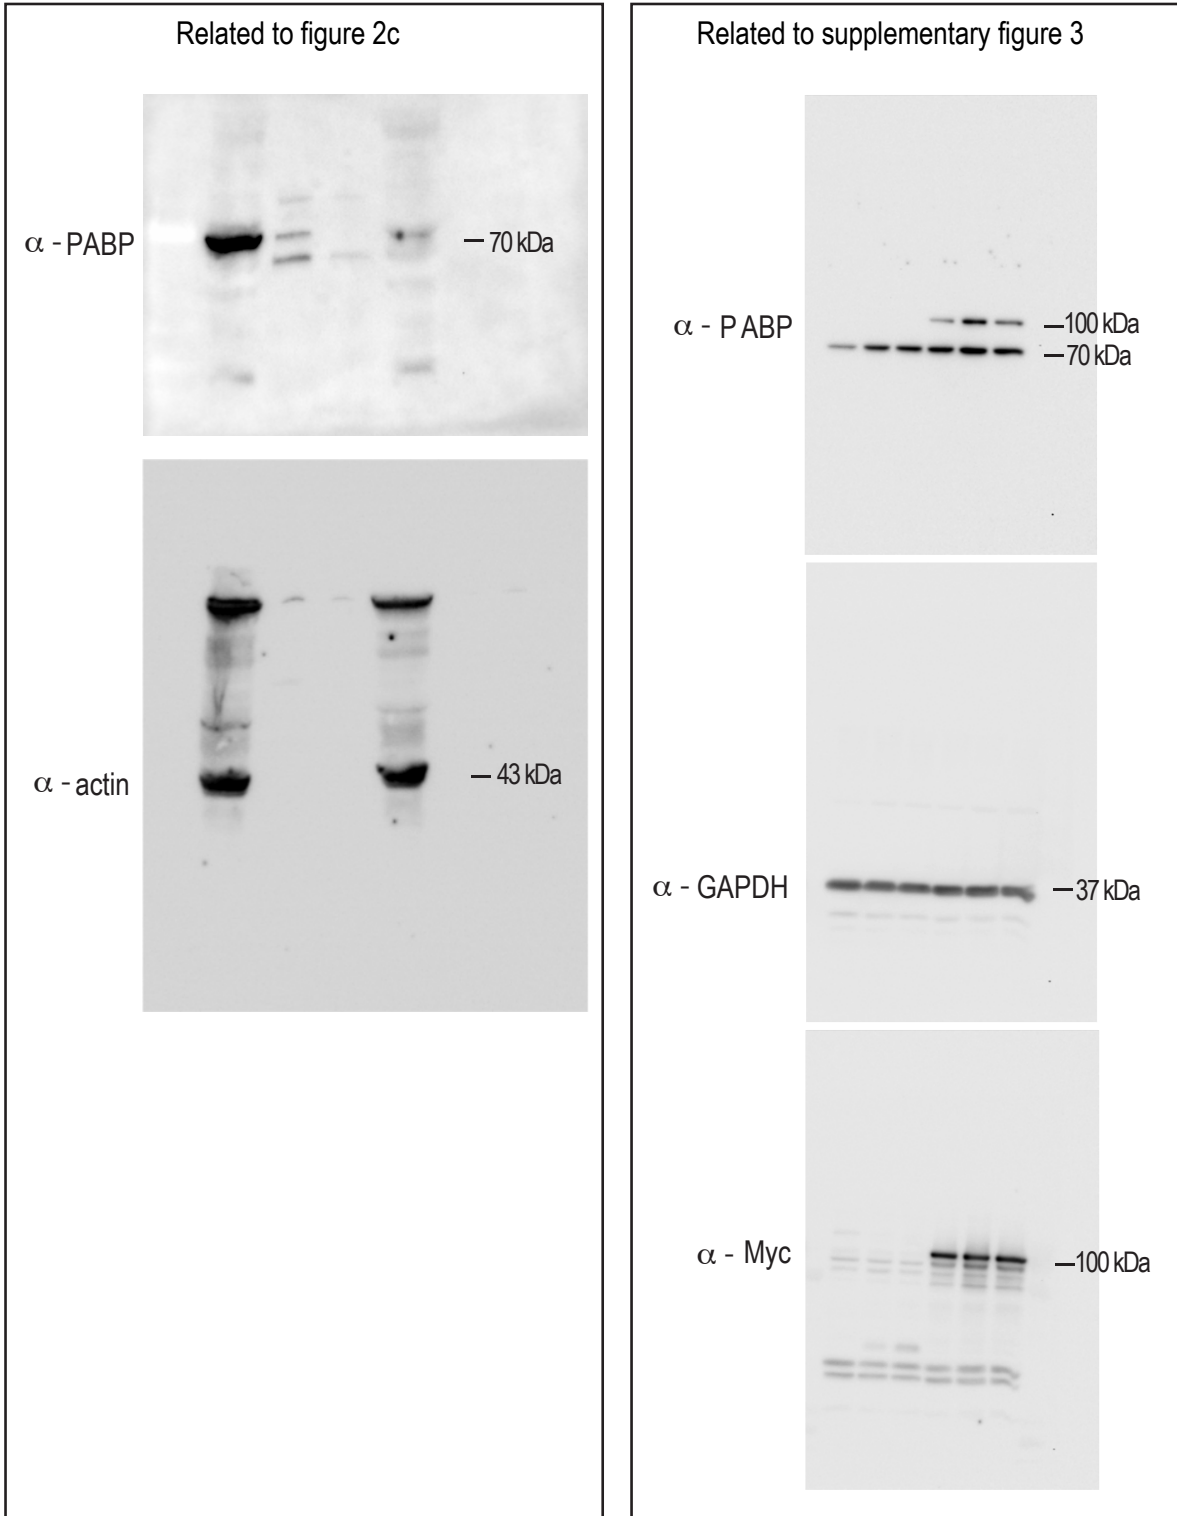

**Supplementary figure 4.** Full blots related to figure 2c and supplementary figure 3.
